# Supplementary material
Source: HighWire-hosted journal article supplement (https://bmjopen.bmj.com/content/9/1/e026923)
Supplement: inline-supplementary-material-1 [file inline-supplementary-material-1.pdf]

**Table A1** Associations of intermediate frailty risk with adverse clinical outcomes compared to the low frailty risk group.

| Outcome                        | Intermediate Risk, OR (95% CI), P-value |                                   |                                    |                                    |                                    |
|--------------------------------|-----------------------------------------|-----------------------------------|------------------------------------|------------------------------------|------------------------------------|
|                                | unadjusted                              | Model 1                           | Model 2                            | Model 3                            | NEWS-adjusted                      |
| all-cause 30-day mortality     | 2.53 (2.09 to 3.06), p<0.001            | 2.45 (2.03 to 2.97), p<0.001      | 2.52 (2.08 to 3.06), p<0.001       | 2.65 (2.17 to 3.25), p<0.001       | 2.05 (1.69 to 2.50), p<0.001       |
| Length of stay, median (IQR)*  | 3.74 (3.34 to 4.14), p<0.001            | 3.76 (3.36 to 4.16), p<0.001      | 3.83 (3.45 to 4.21), p<0.001       | 3.77 (3.39 to 4.15), p<0.001       | 3.69 (3.28 to 4.09), p<0.001       |
| Long hospital stay >10 days    | 3.47 (2.99 to 4.02), p<0.001            | 3.50 (3.02 to 4.06), p<0.001      | 3.55 (3.06 to 4.12), p<0.001       | 3.66 (3.14 to 4.28), p<0.001       | 3.44 (2.96 to 3.99), p<0.001       |
| 30-day readmission             | 1.04 (0.88 to 1.24), p=0.643            | 1.06 (0.89 to 1.26), p=0.521      | 1.06 (0.89 to 1.26), p=0.503       | 1.04 (0.87 to 1.24), p=0.69        | 0.99 (0.83 to 1.18), p=0.883       |
| Functional impairment, n (%)   |                                         |                                   |                                    |                                    |                                    |
| Barthel Index, median (IQR)*   | -15.76 (-17.87 to -13.64), p<0.001      | -15.01 (-17.1 to -12.92), p<0.001 | -14.87 (-16.97 to -12.78), p<0.001 | -14.59 (-16.69 to -12.48), p<0.001 | -15.45 (-17.59 to -13.31), p<0.001 |
| Barthel Index <95 points       | 2.98 (2.48 to 3.58), p<0.001            | 2.89 (2.4 to 3.47), p<0.001       | 2.85 (2.36 to 3.43), p<0.001       | 2.87 (2.37 to 3.47), p<0.001       | 2.87 (2.38 to 3.45), p<0.001       |
| Quality of Life, n(%)          |                                         |                                   |                                    |                                    |                                    |
| Impairment of mobility         | 3.25 (2.59 to 4.08), p<0.001            | 3.14 (2.50 to 3.95), p<0.001      | 3.13 (2.49 to 3.94), p<0.001       | 3.1 (2.46 to 3.92), p<0.001        | 3.17 (2.52 to 3.99), p<0.001       |
| Impairment of self-care        | 3.69 (3.07 to 4.44), p<0.001            | 3.60 (2.99 to 4.35), p<0.001      | 3.56 (2.95 to 4.30), p<0.001       | 3.63 (2.99 to 4.4), p<0.001        | 3.55 (2.95 to 4.28), p<0.001       |
| Impairment of usual activities | 2.51 (2.08 to 3.05), p<0.001            | 2.41 (1.99 to 2.93), p<0.001      | 2.35 (1.93 to 2.87), p<0.001       | 2.35 (1.92 to 2.87), p<0.001       | 2.45 (2.02 to 2.98), p<0.001       |
| Pain/discomfort                | 1.25 (1.04 to 1.51), p=0.017            | 1.26 (1.04 to 1.51), p=0.015      | 1.22 (1.01 to 1.47), p=0.036       | 1.21 (1 to 1.47), p=0.047          | 1.29 (1.07 to 1.55), p=0.008       |
| Anxiety/depression             | 1.26 (1.03 to 1.55), p=0.023            | 1.28 (1.04 to 1.56), p=0.018      | 1.25 (1.02 to 1.53), p=0.032       | 1.26 (1.02 to 1.55), p=0.029       | 1.22 (1.00 to 1.50), p=0.053       |
| EQ-VAS, mean (SD)*             | -3.9 (-5.83 to -1.97), p<0.001          | -3.87 (-5.81 to -1.93), p<0.001   | -3.78 (-5.73 to -1.84), p<0.001    | -3.75 (-5.69 to -1.81), p<0.001    | -3.57 (-5.52 to -1.61), p<0.001    |
| discharge other than home      | 2.46 (2.13 to 2.83), p<0.001            | 2.39 (2.07 to 2.75), p<0.001      | 2.39 (2.07 to 2.75), p<0.001       | 2.53 (2.18 to 2.92), p<0.001       | 2.15 (1.86 to 2.48), p<0.001       |

95% CI confidence interval; EQ-VAS EuroQol visual analog health scale; IQR interquartile range; NEWS national early warning score; OR odds ratio; SD standard deviation;

Quality of life measures were adapted from EQ-5D. We dichotomized levels into "no impairment" (level 1) and "impairment" (levels 2 and 3). Frequencies of reported impairment (level 2 and 3) were analyzed.

Models were adjusted for age (model 1), age and gender (model 2), age, gender, and comorbidities not included in the score (model 3), and for NEWS which was calculated retrospectively based on admission data.

\* linear regression analyses were calculated reporting regression coefficient, 95% confidence interval, P-value

**Table A2** Associations of high frailty risk with adverse clinical outcomes compared to the low frailty risk group.

| Outcome                        | High Risk, OR (95% CI), P-value    |                                    |                                    |                                    |                                    |
|--------------------------------|------------------------------------|------------------------------------|------------------------------------|------------------------------------|------------------------------------|
|                                | unadjusted                         | Model 1                            | Model 2                            | Model 3                            | NEWS adjusted                      |
| all-cause 30-day mortality     | 4.40 (2.94 to 6.57), p<0.001       | 4.28 (2.86 to 6.41), p<0.001       | 4.49 (2.99 to 6.73), p<0.001       | 4.83 (3.17 to 7.37), p<0.001       | 3.68 (2.41 to 5.60), p<0.001       |
| Length of stay, median (IQR)*  | 10.04 (8.92 to 11.16), p<0.001     | 10.06 (8.94 to 11.18), p<0.001     | 10.12 (9.06 to 11.19), p<0.001     | 10.07 (9.02 to 11.13), p<0.001     | 9.98 (8.86 to 11.10), p<0.001      |
| Long hospital stay >10 days    | 9.21 (6.51 to 13.01), p<0.001      | 9.28 (6.56 to 13.12), p<0.001      | 9.42 (6.66 to 13.33), p<0.001      | 9.75 (6.83 to 13.92), p<0.001      | 9.10 (6.43 to 12.88), p<0.001      |
| 30-day readmission             | 1.47 (0.95 to 2.26), p=0.081       | 1.49 (0.97 to 2.29), p=0.070       | 1.49 (0.97 to 2.30), p=0.069       | 1.67 (1.08 to 2.59), p=0.022       | 1.38 (0.90 to 2.13), p=0.141       |
| Functional impairment, n (%)   |                                    |                                    |                                    |                                    |                                    |
| Barthel Index, median (IQR)*   | -40.55 (-47.01 to -34.09), p<0.001 | -40.29 (-46.66 to -33.93), p<0.001 | -40.01 (-46.37 to -33.64), p<0.001 | -39.70 (-46.06 to -33.33), p<0.001 | -40.06 (-46.54 to -33.58), p<0.001 |
| Barthel Index <95 points       | 22.37 (8.04 to 62.23), p<0.001     | 23.74 (8.48 to 66.44), p<0.001     | 22.9 (8.19 to 64.06), p<0.001      | 25.03 (8.91 to 70.32), p<0.001     | 21.12 (7.58 to 58.83), p<0.001     |
| Quality of Life, n(%)          |                                    |                                    |                                    |                                    |                                    |
| Impairment of mobility         | 8.61 (4.97 to 14.91), p<0.001      | 8.62 (4.95 to 15.01), p<0.001      | 8.57 (4.92 to 14.93), p<0.001      | 8.45 (4.82 to 14.81), p<0.001      | 8.29 (4.77 to 14.40), p<0.001      |
| Impairment of self-care        | 9.40 (4.70 to 18.79), p<0.001      | 9.67 (4.8 to 19.48), p<0.001       | 9.39 (4.66 to 18.90), p<0.001      | 9.59 (4.74 to 19.41), p<0.001      | 8.85 (4.42 to 17.73), p<0.001      |
| Impairment of usual activities | 4.16 (2.08 to 8.31), p<0.001       | 4.19 (2.08 to 8.44), p<0.001       | 3.88 (1.92 to 7.82), p<0.001       | 3.98 (1.97 to 8.06), p<0.001       | 4.00 (2.00 to 8.00), p<0.001       |
| Pain/discomfort                | 1.39 (0.77 to 2.52), p=0.278       | 1.39 (0.77 to 2.52), p=0.276       | 1.28 (0.70 to 2.34), p=0.413       | 1.28 (0.70 to 2.33), p=0.430       | 1.45 (0.80 to 2.63), p=0.225       |
| Anxiety/depression             | 3.29 (1.73 to 6.26), p<0.001       | 3.29 (1.73 to 6.27), p<0.001       | 3.08 (1.61 to 5.89), p=0.001       | 3.11 (1.62 to 5.99), p=0.001       | 3.11 (1.63 to 5.95), p=0.001       |
| EQ-VAS, mean (SD)*             | -10.3 (-17.53 to -3.08), p=0.005   | -10.3 (-17.53 to -3.07), p=0.005   | -10.13 (-17.37 to -2.90), p=0.006  | -11.12 (-18.29 to -3.94), p=0.002  | -9.77 (-17.01 to -2.54), p=0.008   |
| discharge other than home      | 3.54 (2.50 to 5.01), p<0.001       | 3.46 (2.44 to 4.90), p<0.001       | 3.46 (2.44 to 4.90), p<0.001       | 3.81 (2.68 to 5.42), p<0.001       | 3.09 (2.17 to 4.41), p<0.001       |

95% CI confidence interval; EQ-VAS EuroQol visual analog health scale; IQR interquartile range; NEWS national early warning score; OR odds ratio; SD standard deviation;

Quality of life measures were adapted from EQ-5D. We dichotomized levels into "no impairment" (level 1) and "impairment" (levels 2 and 3). Frequencies of reported impairment (level 2 and 3) were analyzed.

Models were adjusted for age (model 1), age and gender (model 2), age, gender, and comorbidities not included in the score (model 3), and for NEWS which was calculated retrospectively based on admission data.

\* linear regression analyses were calculated reporting regression coefficient, 95% confidence interval, P-value

**Table A3** ROC analyses of different frailty score cut-offs for the outcome 30-day mortality

| low risk |                | intermediate risk |                | high risk |                | AUC (95% CI)           |
|----------|----------------|-------------------|----------------|-----------|----------------|------------------------|
| Cut-off  | No of patients | Cut-off           | No of patients | Cut-off   | No of patients |                        |
|          | 63.55 %        | 5-15              | 33.55 %        | >15       | 2.9 %          | 0.624 (0.601 to 0.647) |
| <5       | 63.55 %        | 5-10              | 24.69 %        | >10       | 11.76 %        | 0.629 (0.605 to 0.652) |
| <4       | 55.09 %        | 4-10              | 33.15 %        | >10       | 11.76 %        | 0.636 (0.613 to 0.660) |
| <4       | 55.09 %        | 4-9               | 30.18 %        | >9        | 14.73 %        | 0.637 (0.613 to 0.660) |

AUC, area under the receiver operating curve; 95% CI, 95% confidence interval
